# Supplementary material for: The choice of negative control antisense oligonucleotides dramatically impacts downstream analysis depending on the cellular background
Source: BMC Genom Data. 2021 Sep 14;22:33. doi: 10.1186/s12863-021-00992-1 (PMC8439024; doi:10.1186/s12863-021-00992-1)
Supplement: Supplementary file 1 — Additional file 1. List of ASO sequences. [file 12863_2021_992_MOESM1_ESM.xlsx]

## Sheet: Additional file 1
The choice of negative control antisense oligonucleotides dramatically impacts downstream analysis depending on the cellular background
Luca Ducoli, Saumya Agrawal, Chung-Chau Hon, Jordan A. Ramilowski, Eliane Sibler, Michihira Tagami, Masayoshi Itoh, Naoto Kondo, Imad Abugessaisa, Akira Hasegawa, Takeya Kasukawa, Harukazu Suzuki, Piero Carninci, Jay W. Shin, Michiel J. L. de Hoon, Michael Detmar
Additional file 1
List of ASO sequences. + LNA base, * phoshorothioated DNA base
Target Name	Sequence
Negative Control A	AACACGTCTATACGC	commercially available (#Cat: LG00000002, Qiagen)
Negative Control B	GCTCCCTTCAATCCAA	commercially available (#Cat: LG00000001, Qiagen)
AL583785.1 (ENSG00000226197) ASO 1	+A*+C*A*T*T*A*C*C*C*T*C*G*C*C*A*+T*+A*
AL583785.1 (ENSG00000226197) ASO 2	+C*+C*+C*+A*A*T*A*A*G*A*A*A*C*G*A*+G*+G*
AL583785.1 (ENSG00000226197) ASO 3	+T*+T*T*C*G*T*G*T*G*T*G*G*T*A*+G*+T*+A*
LETR1 (ENSG00000248441) ASO 1	+A*+C*+A*A*G*T*G*A*A*C*C*C*T*G*C*+C*+C*
LETR1 (ENSG00000248441) ASO 2	+A*+T*C*C*C*A*A*A*C*T*G*C*T*+A*+T*+C*+G*
LETR1 (ENSG00000248441) ASO 3	+G*+A*+G*+T*T*A*C*G*A*A*G*G*A*T*T*+A*+G*
LINC00973 (ENSG00000240476) ASO 1	+A*+C*C*A*G*A*A*G*T*C*G*T*G*C*C*T*+A*+G*
LINC00973 (ENSG00000240476) ASO 2	+A*+G*+C*+A*A*T*A*G*T*G*G*T*C*T*T*+A*+T*
LINC00973 (ENSG00000240476) ASO 3	+C*+C*T*C*G*G*A*C*A*A*A*T*G*+A*+T*+T*+A*
LINC01013 (ENSG00000228495) ASO 1	+C*+C*+A*A*C*G*A*T*A*G*T*A*A*+G*+A*+T*+A*
LINC01013 (ENSG00000228495) ASO 2	+G*+A*+C*A*A*C*A*G*A*T*A*C*G*G*+G*+A*+T*
LINC01013 (ENSG00000228495) ASO 3	+T*+T*A*C*G*A*C*A*C*T*C*A*C*+C*+T*+T*+G*
