# Supplementary material for: The choice of negative control antisense oligonucleotides dramatically impacts downstream analysis depending on the cellular background
Source: BMC Genom Data. 2021 Sep 14;22:33. doi: 10.1186/s12863-021-00992-1 (PMC8439024; doi:10.1186/s12863-021-00992-1)
Supplement: Supplementary file 5 — Additional file 5. List of primers for qPCR. [file 12863_2021_992_MOESM5_ESM.xlsx]

## Sheet: Additional file 5
The choice of negative control antisense oligonucleotides dramatically impacts downstream analysis depending on the cellular background
Luca Ducoli, Saumya Agrawal, Chung-Chau Hon, Jordan A. Ramilowski, Eliane Sibler, Michihira Tagami, Masayoshi Itoh, Naoto Kondo, Imad Abugessaisa, Akira Hasegawa, Takeya Kasukawa, Harukazu Suzuki, Piero Carninci, Jay W. Shin, Michiel J. L. de Hoon, Michael Detmar
Additional file 5
List of primers for qPCR
Target Name	Forward	Reverse
GAPDH	GAAATCCCATCACCATCTTCCAGG	GAGCCCCAGCCTTCTCCATG
LETR1	TGCAAGGGAAAGAATTCAGAG	CATCTCAATTTCTCCATCTTAGGG
AL583785.1	GGACACTGTTTCAAGATTCCTG	TGTACGCTTGTGATTACCCT
LINC00973	TGGCTGCAGTAATGAGTAGAG	CGGACAAATGATTATGCTTCC
LINC01013	CAGTGGGAGAACAAGGAGAG	TTAGCTGAGACAGAAGCTACTG
FARS2	GCGCATAAACAAGAGACAC	TTATCTCCAGCTCATCTCCA
EXTL2	TGTTGATGGTAGATGATGACAC	GATCAGGAAATTGCTGCCA
COLEC12	ATTTATGCTGGGCAGTGGA	ATGACAGTACTGTCTCCCTG
